# Supplementary material
Source: PubMed Central journal article supplement (PMC7020846)
Supplement: JCOPDF-6-384-s001.pdf [file JCOPDF-6-384-s001.pdf]

Figure S1

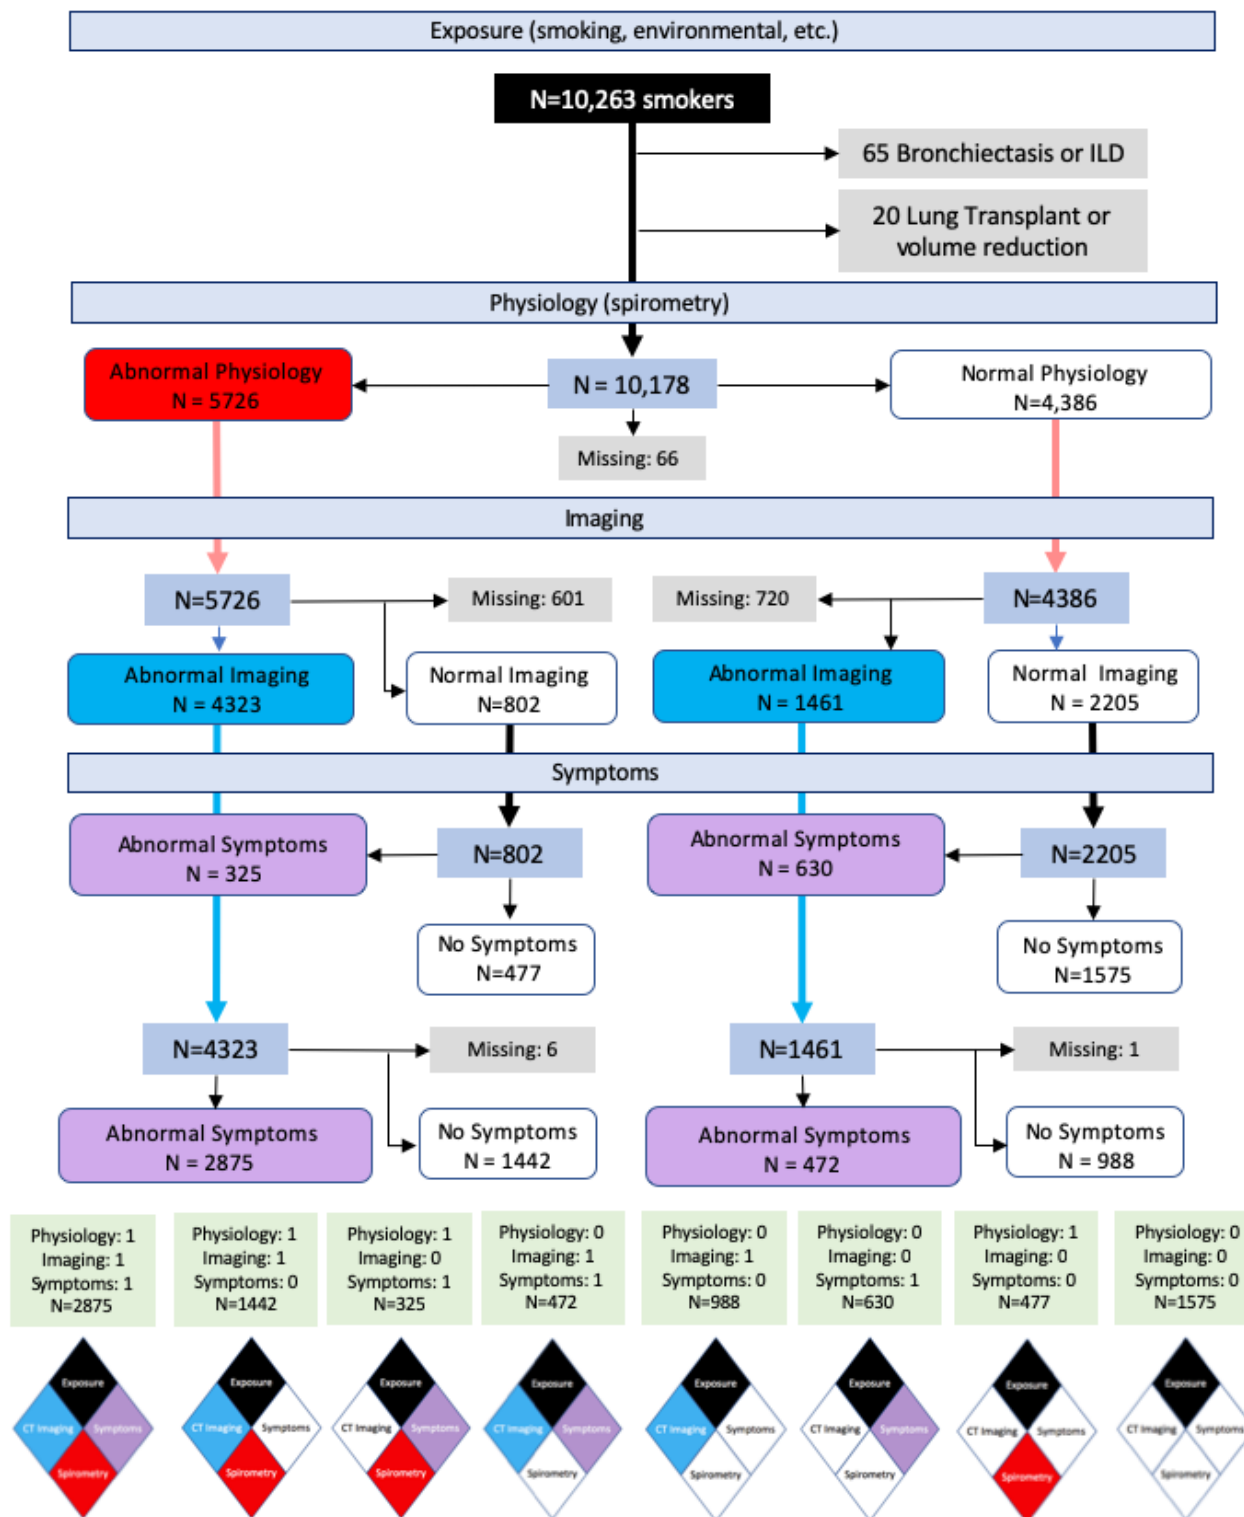

**Figure S1:** Consort diagram showing how each classification category is formed through a combination of exposure, spirometry, imaging, and symptoms. The diagram also demonstrates how many participants are in each category. To ease identification of categories, each disease aspect is identified by a different color. Exposure is represented by black, abnormal spirometry (FEV1, < 80% predicted and/or FEV1/FVC < 0.70) is represented by red, abnormal CT imaging (emphysema  $\geq 5\%$ , gas-trapping  $\geq 15\%$ , and/or Pi10  $\geq 2.55$  mm) is represented by blue, and symptoms (chronic bronchitis or MMRC dyspnea  $\geq 2$ ) are represented by purple.

**Table S1. Demographics, Spirometry and Symptoms of the Individuals Included in this Analysis and Those Excluded Due to Missing Data as Shown in Supplement Figure S1.**

|                              | <b>Included<br/>Individuals</b> | <b>Excluded Individuals<br/>Due to Missing Data</b> |
|------------------------------|---------------------------------|-----------------------------------------------------|
| n                            | 8784                            | 1394                                                |
| Sex (% Male)                 | 53.5%                           | 53.3%                                               |
| Race (%NHW)                  | 51%                             | 69%                                                 |
| Age                          | 59.8 (9.1)                      | 57.9 (8.8)                                          |
| Body Mass Index              | 28.8 (6.2)                      | 29.0 (6.8)                                          |
| Pack Years                   | 44.6 (25.0)                     | 41.4 (24.3)                                         |
| Current Smokers              | 51.8%                           | 61.9%                                               |
| <b>Spirometry</b>            |                                 |                                                     |
| FEV <sub>1</sub> % predicted | 75.8 (25.6)                     | 80.3 (24.2) <sup>†</sup>                            |
| FVC % predicted              | 87.0 (18.2)                     | 86.8 (18.4) <sup>†</sup>                            |
| FEV <sub>1</sub> /FVC        | 0.66 (0.16)                     | 0.71 (0.14) <sup>†</sup>                            |
| <b>Symptoms</b>              |                                 |                                                     |
| SGRQ Total Score             | 27.4 (22.9)                     | 27.1 (23.3)                                         |
| Distance walked (feet)       | 1359 (398)                      | 1296 (397)                                          |
| mMRC ≥ 2                     | 41.9%                           | 43.1%                                               |
| Chronic Bronchitis           | 19.5%                           | 17.1%                                               |
| Severe Exacerbations         | 12.0%                           | 11.2%                                               |

<sup>†</sup> Sample size is 1328

Results shown are mean (SD) or percent (%) as indicated. NHW – Non-Hispanic White, SGRQ – St. George’s Respiratory Questionnaire, mMRC – modified Medical Research Council Dyspnea Score

**Table S2-A. Characteristics of Individuals Included in Category A in Figure 2.** Individuals included in the analysis of FEV<sub>1</sub> decline are listed as those with a Phase 2 visit and FEV<sub>1</sub> measured. Data for missing individuals are shown for those who were alive but did not have a Phase 2 visit with FEV<sub>1</sub> measured and those who died and did not have a Phase 2 visit. Deaths due to respiratory death are separately listed. All data are from the baseline visit (i.e., Phase 1).

| <b>Category A</b>                                  |                                |                                   |                              |                           |
|----------------------------------------------------|--------------------------------|-----------------------------------|------------------------------|---------------------------|
| <b>N=1575</b>                                      |                                |                                   |                              |                           |
| <b>CATEGORY</b>                                    | <b>Visit 2 FEV<sub>1</sub></b> | <b>No Visit 2 FEV<sub>1</sub></b> | <b>No Visit 2 &amp; Died</b> | <b>Respiratory Death*</b> |
| N                                                  | 999                            | 503                               | 73                           | 1                         |
| Sex (% Male)                                       | 45.2%                          | 57.3%                             | 74.0%                        | 100%                      |
| Race (% NHW)                                       | 71.7%                          | 58.4%                             | 53.4%                        | 0%                        |
| Age (yrs)                                          | 57.6 (8.2)                     | 54.7 (7.6)                        | 57.7 (8.5)                   | 53.6                      |
| BMI (Kg/m <sup>2</sup> )                           | 28.9 (5.2)                     | 28.6 (5.4)                        | 28.2 (5.5)                   | 21.42                     |
| Pack years                                         | 34.9 (19.5)                    | 35.03 (17.4)                      | 36.91 (16.7)                 | 29                        |
| Current Smoker                                     | 45.2%                          | 64.0%                             | 74.0%                        | 100%                      |
| <b>Spirometry</b>                                  |                                |                                   |                              |                           |
| FEV <sub>1</sub> % predicted                       | 98.2 (11.3)                    | 98.8 (11.3)                       | 95.8 (10.6)                  | 95.2                      |
| FVCP% predicted                                    | 96.2 (11.4)                    | 97.1 (11.7)                       | 93.8 (10.8)                  | 91.4                      |
| FEV <sub>1</sub> /FVC                              | 0.79 (0.05)                    | 0.8 (0.05)                        | 0.79 (0.05)                  | 0.82                      |
| <b>CT Metrics</b>                                  |                                |                                   |                              |                           |
| Emphysema (LAA% ≤ -950 HU)                         | 1.30 (1.22)                    | 1.15 (1.16)                       | 1.11 (1.07)                  | 0.4                       |
| Gas Trapping (LAA% ≤ -856 HU)                      | 6.56 (3.98)                    | 6.03 (4.03)                       | 6.44 (3.79)                  | 10.25                     |
| Pi10, mm                                           | 1.87 (0.27)                    | 1.91 (0.28)                       | 1.86 (0.31)                  | 1.39                      |
| <b>Symptoms</b>                                    |                                |                                   |                              |                           |
| SGRQ Total Score                                   | 8.22 (9.23)                    | 9.18 (10.32)                      | 11.65 (11.00)                | 20.7                      |
| Distance walked (feet)                             | 1617 (332)                     | 1554 (333)                        | 1507 (303)                   | 861                       |
| mMRC ≥2                                            | 0%                             | 0%                                | 0%                           | 0%                        |
| Chronic bronchitis                                 | 0%                             | 0%                                | 0%                           | 0%                        |
| Severe Exacerbation                                | 1.0%                           | 1.4%                              | 2.7%                         | 0%                        |
| *Cause of death was adjudicated for 88% of deaths. |                                |                                   |                              |                           |

Results shown are mean (SD) or percent (%) as indicated. NHW – Non-Hispanic White, SGRQ – St. George’s Respiratory Questionnaire, mMRC – modified Medical Research Council Dyspnea Score, Pi10 – Square root of airway wall area for a standardized airway of 10 mm internal perimeter. %LAA – Percent Low attenuation area, HU – Hounsfield Units

**Table S2-B: Characteristics of Individuals Included in Category B in Figure 2.** Individuals included in the analysis of FEV<sub>1</sub> decline are listed as those with a Phase 2 visit and FEV<sub>1</sub> measured. Data for missing individuals are shown for those who were alive but did not have a Phase 2 visit with FEV<sub>1</sub> measured and those who died and did not have a Phase 2 visit. Deaths due to respiratory death are also listed. All data are from the baseline visit (i.e., Phase 1).

| <b>Category B</b>                                  |                                |                                   |                              |                           |
|----------------------------------------------------|--------------------------------|-----------------------------------|------------------------------|---------------------------|
| <b>N=988</b>                                       |                                |                                   |                              |                           |
| <b>CATEGORY</b>                                    | <b>Visit 2 FEV<sub>1</sub></b> | <b>No Visit 2 FEV<sub>1</sub></b> | <b>No Visit 2 &amp; Died</b> | <b>Respiratory Death*</b> |
| N                                                  | 652                            | 286                               | 50                           | 2                         |
| Sex (% Male)                                       | 60.4%                          | 65.0%                             | 78.0%                        | 100%                      |
| Race (% NHW)                                       | 75.8%                          | 49.0%                             | 60.0%                        | 50.0%                     |
| Age (yrs)                                          | 60.2 (8.8)                     | 56.2 (9.1)                        | 59.0 (10.0)                  | 66.2 (7.5)                |
| BMI (Kg/m <sup>2</sup> )                           | 28.2 (5.4)                     | 27.4 (4.8)                        | 27.3 (5.0)                   | 26.1 (9.0)                |
| Pack years                                         | 37.4 (20.4)                    | 37.3 (18.6)                       | 40.0 (19.0)                  | 28.3 (16.6)               |
| Current Smoker                                     | 36.7%                          | 67.8%                             | 64.0%                        | 0%                        |
| <b>Spirometry</b>                                  |                                |                                   |                              |                           |
| FEV <sub>1</sub> % predicted                       | 98.4 (12.0)                    | 97.8 (11.9)                       | 95.9 (10.9)                  | 90.6 (14.6)               |
| FVCPP % predicted                                  | 98.5 (12.5)                    | 98.6 (11.9)                       | 96.7 (10.9)                  | 92.2 (10.9)               |
| FEV <sub>1</sub> /FVC                              | 0.77 (0.05)                    | 0.78 (0.05)                       | 0.76 (0.05)                  | 0.74 (0.03)               |
| <b>CT Metrics</b>                                  |                                |                                   |                              |                           |
| Emphysema (LAA% ≤ -950 HU)                         | 4.46 (4.00)                    | 2.84 (3.10)                       | 3.51 (4.14)                  | 16.36 (11.76)             |
| Gas Trapping (LAA% ≤ -856 HU)                      | 18.41 (9.61)                   | 16.18 (9.50)                      | 15.92 (9.42)                 | 26.9 (20.7)               |
| Pi10, mm                                           | 2.03 (0.56)                    | 2.31 (0.62)                       | 2.23 (0.60)                  | 1.85 (0.37)               |
| <b>Symptoms</b>                                    |                                |                                   |                              |                           |
| SGRQ Total Score                                   | 8.31 (9.86)                    | 10.19 (11.49)                     | 12.47 (12.51)                | 8.82 (12.47)              |
| Distance walked (feet)                             | 1569 (323)                     | 1462 (346)                        | 1489 (305)                   | 1332 (482)                |
| mMRC ≥2                                            | 0%                             | 0%                                | 0%                           | 0%                        |
| Chronic bronchitis                                 | 0%                             | 0%                                | 0%                           | 0%                        |
| Severe Exacerbation                                | 0.9%                           | 3.1%                              | 4.0%                         | 0%                        |
| *Cause of death was adjudicated for 78% of deaths. |                                |                                   |                              |                           |

Results shown are mean (SD) or percent (%) as indicated. NHW – Non-Hispanic White, SGRQ – St. George’s Respiratory Questionnaire, mMRC – modified Medical Research Council Dyspnea Score, Pi10 – Square root of airway wall area for a standardized airway of 10 mm internal perimeter. %LAA – Percent Low attenuation area, HU – Hounsfield Units

**Table S2-C. Characteristics of Individuals Included in Category C in Figure 2.** Individuals included in the analysis of FEV<sub>1</sub> decline are listed as those with a Phase 2 visit and FEV<sub>1</sub> measured. Data for missing individuals are shown for those who were alive but did not have a Phase 2 visit with FEV<sub>1</sub> measured and those who died and did not have a Phase 2 visit. Deaths due to respiratory death are also listed. All data are from the baseline visit (i.e., Phase 1).

| <b>Category C</b>                                  |                                |                                   |                              |                           |
|----------------------------------------------------|--------------------------------|-----------------------------------|------------------------------|---------------------------|
| <b>N=630</b>                                       |                                |                                   |                              |                           |
| <b>CATEGORY</b>                                    | <b>Visit 2 FEV<sub>1</sub></b> | <b>No Visit 2 FEV<sub>1</sub></b> | <b>No Visit 2 &amp; Died</b> | <b>Respiratory Death*</b> |
| N                                                  | 356                            | 236                               | 38                           | 3                         |
| Sex (% Male)                                       | 37.4%                          | 47.9%                             | 47.4%                        | 100%                      |
| Race % NHW)                                        | 49.7%                          | 44.5%                             | 63.2%                        | 100%                      |
| Age (yrs)                                          | 55.5 (7.6)                     | 53.3 (6.8)                        | 59.3 (9.7)                   | 66.8 (14.3)               |
| BMI (Kg/m <sup>2</sup> )                           | 30.6 (6.4)                     | 30.2 (6.4)                        | 30.6 (7.7)                   | 26.4 (3.7)                |
| Pack years                                         | 38.6 (20.5)                    | 39.7 (20.5)                       | 41.5 (25.6)                  | 25.1 (5.7)                |
| Current Smoker                                     | 74.2%                          | 83.1%                             | 71.1%                        | 0%                        |
| <b>Spirometry</b>                                  |                                |                                   |                              |                           |
| FEV <sub>1</sub> % predicted                       | 96.5 (11.0)                    | 97.2 (11.3)                       | 96.8 (13.8)                  | 93.1 (7.9)                |
| FVCPP % predicted                                  | 94.8 (11.2)                    | 96.2 (11.8)                       | 94.7 (14.8)                  | 84.2 (4.2)                |
| FEV <sub>1</sub> /FVC                              | 0.80 (0.05)                    | 0.80 (0.05)                       | 0.79 (0.05)                  | 0.82 (0.06)               |
| <b>CT Metrics</b>                                  |                                |                                   |                              |                           |
| Emphysema (LAA% ≤ -950 HU)                         | 0.94 (1.06)                    | 0.90 (1.05)                       | 1.07 (1.12)                  | 0.65 (0.43)               |
| Gas Trapping (LAA% ≤ -856 HU)                      | 6.10 (4.15)                    | 5.60 (3.95)                       | 6.69 (4.26)                  | 3.78 (0.64)               |
| Pi10, mm                                           | 1.94 (0.26)                    | 1.96 (0.27)                       | 1.97 (0.26)                  | 1.69 (0.09)               |
| <b>Symptoms</b>                                    |                                |                                   |                              |                           |
| SGRQ Total Score                                   | 32.1 (18.5)                    | 36.2 (18.7)                       | 37.6 (17.5)                  | 38.1 (15.1)               |
| Distance walked (feet)                             | 1383 (335)                     | 1380 (311)                        | 1259 (303)                   | 1300 (400)                |
| mMRC ≥2                                            | 74.7%                          | 75.8%                             | 76.3%                        | 33.3%                     |
| Chronic bronchitis                                 | 42.1%                          | 44.9%                             | 50.0%                        | 66.7%                     |
| Severe Exacerbation                                | 8.7%                           | 9.7%                              | 10.5%                        | 66.7%                     |
| *Cause of death was adjudicated for 95% of deaths. |                                |                                   |                              |                           |

Results shown are mean (SD) or percent (%) as indicated. NHW – Non-Hispanic White, SGRQ – St. George’s Respiratory Questionnaire, mMRC – modified Medical Research Council Dyspnea Score, Pi10 – Square root of airway wall area for a standardized airway of 10 mm internal perimeter. %LAA – Percent Low attenuation area, HU – Hounsfield Units

**Table S2-D. Characteristics of Individuals Included in Category D in Figure 2.** Participants included in the analysis of FEV<sub>1</sub> decline are listed as those with a Phase 2 visit and FEV<sub>1</sub> measured. Data for missing individuals are shown for those who were alive but did not have a Phase 2 visit with FEV<sub>1</sub> measured and those who died and did not have a Phase 2 visit. Deaths due to respiratory death are also listed. All data are from the baseline visit (i.e., Phase 1).

| <b>Category D</b>                                  |                                |                                   |                              |                           |
|----------------------------------------------------|--------------------------------|-----------------------------------|------------------------------|---------------------------|
| <b>N=477</b>                                       |                                |                                   |                              |                           |
| <b>CATEGORY</b>                                    | <b>Visit 2 FEV<sub>1</sub></b> | <b>No Visit 2 FEV<sub>1</sub></b> | <b>No Visit 2 &amp; Died</b> | <b>Respiratory Death*</b> |
| N                                                  | 295                            | 153                               | 29                           | 1                         |
| Sex (% Male)                                       | 47.8%                          | 55.6%                             | 69.0%                        | 100%                      |
| Race (% NHW)                                       | 79.3%                          | 58.8%                             | 72.4%                        | 100%                      |
| Age (yrs)                                          | 59.9 (8.2)                     | 57.1 (8.8)                        | 63.5 (8.7)                   | 66.0                      |
| BMI (Kg/m <sup>2</sup> )                           | 29.3 (5.6)                     | 28.9 (5.3)                        | 28.5 (5.9)                   | 25.6                      |
| Pack years                                         | 40.6 (22.5)                    | 38.6 (17.7)                       | 52.4 (25.5)                  | 52.0                      |
| Current Smoker                                     | 49.2%                          | 71.2%                             | 55.2%                        | 100%                      |
| <b>Spirometry</b>                                  |                                |                                   |                              |                           |
| FEV <sub>1</sub> % predicted                       | 77.3 (10.7)                    | 77.6 (11.4)                       | 75.1 (11.8)                  | 77.0                      |
| FVCP% predicted                                    | 85.0 (16.0)                    | 84.2 (16.4)                       | 79.6 (15.5)                  | 75.8                      |
| FEV <sub>1</sub> /FVC                              | 0.71 (0.08)                    | 0.73 (0.08)                       | 0.72 (0.06)                  | 0.76                      |
| <b>CT Metrics</b>                                  |                                |                                   |                              |                           |
| Emphysema (LAA% ≤ -950 HU)                         | 1.37 (1.25)                    | 1.09 (1.06)                       | 1.37 (1.13)                  | 0.60                      |
| Gas Trapping (LAA% ≤ -856 HU)                      | 7.63 (4.09)                    | 7.12 (3.96)                       | 8.48 (4.30)                  | 1.55                      |
| Pi10, mm                                           | 2.06 (0.25)                    | 2.10 (0.25)                       | 2.12 (0.19)                  | 2.26                      |
| <b>Symptoms</b>                                    |                                |                                   |                              |                           |
| SGRQ Total Score                                   | 10.77 (10.71)                  | 13.30 (11.47)                     | 9.46 (8.65)                  | 18.57                     |
| Distance walked (feet)                             | 1535 (295)                     | 1461 (326)                        | 1314 (362)                   | 1310                      |
| mMRC ≥2                                            | 0%                             | 0%                                | 0%                           | 0%                        |
| Chronic bronchitis                                 | 0%                             | 0%                                | 0%                           | 0%                        |
| Severe Exacerbation                                | 2.4%                           | 2.0%                              | 3.4%                         | 0%                        |
| *Cause of death was adjudicated for 83% of deaths. |                                |                                   |                              |                           |

Results shown are mean (SD) or percent (%) as indicated. NHW – Non-Hispanic White, SGRQ – St. George’s Respiratory Questionnaire, mMRC – modified Medical Research Council Dyspnea Score, Pi10 – Square root of airway wall area for a standardized airway of 10 mm internal perimeter. %LAA – Percent Low attenuation area, HU – Hounsfield Units

**Table S2-E. Characteristics of Individuals Included in Category E in Figure 2.** Individuals included in the analysis of FEV<sub>1</sub> decline are listed as those with a Phase 2 visit and FEV<sub>1</sub> measured. Data for missing individuals are shown for those who were alive but did not have a Phase 2 visit with FEV<sub>1</sub> measured and those who died and did not have a Phase 2 visit. Deaths due to respiratory death are also listed. All data are from the baseline visit (i.e., Phase 1).

| <b>Category E</b>                                  |                                |                                   |                              |                           |
|----------------------------------------------------|--------------------------------|-----------------------------------|------------------------------|---------------------------|
| <b>N=472</b>                                       |                                |                                   |                              |                           |
| <b>CATEGORY</b>                                    | <b>Visit 2 FEV<sub>1</sub></b> | <b>No Visit 2 FEV<sub>1</sub></b> | <b>No Visit 2 &amp; Died</b> | <b>Respiratory Death*</b> |
| N                                                  | 256                            | 180                               | 36                           | 1                         |
| Sex (% Male)                                       | 50.0%                          | 52.2%                             | 69.4%                        | 0%                        |
| Race (% NHW)                                       | 53.1%                          | 42.2%                             | 47.2%                        | 100%                      |
| Age (yrs)                                          | 55.9 (7.9)                     | 53.8 (7.0)                        | 57.3 (10.2)                  | 48.6                      |
| BMI (Kg/m <sup>2</sup> )                           | 30.5 (6.6)                     | 30.6 (6.9)                        | 27.7 (6.06)                  | 27.2                      |
| Pack years                                         | 41.3 (22.1)                    | 39.5 (20.1)                       | 48.7 (26.6)                  | 51.9                      |
| Current Smoker                                     | 69.1%                          | 80.6%                             | 80.6%                        | 100%                      |
| <b>Spirometry</b>                                  |                                |                                   |                              |                           |
| FEV <sub>1</sub> % predicted                       | 94.2 (11.1)                    | 95.8 (11.3)                       | 96.1 (10.6)                  | 103.3                     |
| FVCP% predicted                                    | 95.1 (11.8)                    | 96.1 (12.2)                       | 98.0 (11.5)                  | 104.5                     |
| FEV <sub>1</sub> /FVC                              | 0.78 (0.05)                    | 0.79 (0.06)                       | 0.76 (0.05)                  | 0.79                      |
| <b>CT Metrics</b>                                  |                                |                                   |                              |                           |
| Emphysema (LAA% ≤ -950 HU)                         | 2.44 (3.15)                    | 2.62 (3.60)                       | 2.19 (2.31)                  | 0.18                      |
| Gas Trapping (LAA% ≤ -856 HU)                      | 13.94 (9.18)                   | 14.34 (10.55)                     | 17 (10.16)                   | 1.69                      |
| Pi10, mm                                           | 2.39 (0.60)                    | 2.52 (0.65)                       | 2.44 (0.65)                  | 3.01                      |
| <b>Symptoms</b>                                    |                                |                                   |                              |                           |
| SGRQ Total Score                                   | 34.95 (18.95)                  | 36.27 (18.35)                     | 37.49 (19.72)                | 70.15                     |
| Distance walked (feet)                             | 1324 (357)                     | 1321 (364)                        | 1254 (291)                   | 1003                      |
| mMRC ≥2                                            | 76.2%                          | 79.4%                             | 69.4%                        | 100%                      |
| Chronic bronchitis                                 | 40.2%                          | 40.6%                             | 50.0%                        | 100%                      |
| Severe Exacerbation                                | 11.3%                          | 15.0%                             | 16.7%                        | 0%                        |
| *Cause of death was adjudicated for 81% of deaths. |                                |                                   |                              |                           |

Results shown are mean (SD) or percent (%) as indicated. NHW – Non-Hispanic White, SGRQ – St. George’s Respiratory Questionnaire, mMRC – modified Medical Research Council Dyspnea Score, Pi10 – Square root of airway wall area for a standardized airway of 10 mm internal perimeter. %LAA – Percent Low attenuation area, HU – Hounsfield Units

**Table S2-F. Characteristics of Individuals Included in Category F in Figure 2.** Individuals included in the analysis of FEV<sub>1</sub> decline are listed as those with a Phase 2 visit and FEV<sub>1</sub> measured. Data for missing individuals are shown for those who were alive but did not have a Phase 2 visit with FEV<sub>1</sub> measured and those who died and did not have a Phase 2 visit. Deaths due to respiratory death are also listed. All data are from the baseline visit (i.e., Phase 1).

| <b>Category F</b>                                  |                                |                                   |                              |                           |
|----------------------------------------------------|--------------------------------|-----------------------------------|------------------------------|---------------------------|
| <b>N=325</b>                                       |                                |                                   |                              |                           |
| <b>CATEGORY</b>                                    | <b>Visit 2 FEV<sub>1</sub></b> | <b>No Visit 2 FEV<sub>1</sub></b> | <b>No Visit 2 &amp; Died</b> | <b>Respiratory Death*</b> |
| N                                                  | 173                            | 113                               | 39                           | 5                         |
| Sex (% Male)                                       | 42.8%                          | 42.5%                             | 51.3%                        | 40.0%                     |
| Race (% NHW)                                       | 72.8%                          | 56.6%                             | 69.2%                        | 100%                      |
| Age (yrs)                                          | 58.8 (7.8)                     | 56.1 (7.5)                        | 60.9 (8.9)                   | 62.0 (6.9)                |
| Body Mass Index (Kg/m <sup>2</sup> )               | 32.1 (7.2)                     | 30.6 (6.6)                        | 30.1 (6.8)                   | 29.6 (6.3)                |
| Pack years                                         | 41.0 (19.9)                    | 46.4 (25.8)                       | 51.2 (26.6)                  | 58.5 (35.9)               |
| Current Smoker                                     | 57.8%                          | 77.0%                             | 56.4%                        | 60.0%                     |
| <b>Spirometry</b>                                  |                                |                                   |                              |                           |
| FEV <sub>1</sub> % predicted                       | 73.1 (10.5)                    | 75.7 (12.5)                       | 71.8 (8.1)                   | 73.0 (11.1)               |
| FVCP % predicted                                   | 79.0 (14.4)                    | 83.5 (19.3)                       | 77.0 (10.2)                  | 77.2 (19.0)               |
| FEV <sub>1</sub> /FVC                              | 0.72 (0.07)                    | 0.72 (0.09)                       | 0.72 (0.08)                  | 0.74 (0.08)               |
| <b>CT Metrics</b>                                  |                                |                                   |                              |                           |
| Emphysema (LAA% ≤ -950 HU)                         | 1.17 (1.15)                    | 1.15 (1.15)                       | 1.19 (1.16)                  | 1.34 (1.36)               |
| Gas Trapping (LAA% ≤ -856 HU)                      | 7.55 (4.14)                    | 7.25 (4.22)                       | 8.18 (3.95)                  | 6.87 (2.93)               |
| Pi10, mm                                           | 2.15 (0.24)                    | 2.14 (0.24)                       | 2.18 (0.24)                  | 2.39 (0.08)               |
| <b>Symptoms</b>                                    |                                |                                   |                              |                           |
| SGRQ Total Score                                   | 36.79 (19.00)                  | 39.28 (17.85)                     | 42.71 (18.64)                | 44.5 (19.2)               |
| Distance walked (feet)                             | 1315 (360)                     | 1293 (351)                        | 1194 (318)                   | 1172 (129)                |
| mMRC ≥2                                            | 79.8%                          | 79.6%                             | 87.2%                        | 100%                      |
| Chronic bronchitis                                 | 41.6%                          | 41.6%                             | 41.0%                        | 40.0%                     |
| Severe Exacerbation                                | 12.1%                          | 15.0%                             | 23.1%                        | 20.0%                     |
| *Cause of death was adjudicated for 90% of deaths. |                                |                                   |                              |                           |

Results shown are mean (SD) or percent (%) as indicated. NHW – Non-Hispanic White, SGRQ – St. George’s Respiratory Questionnaire, mMRC – modified Medical Research Council Dyspnea Score, Pi10 – Square root of airway wall area for a standardized airway of 10 mm internal perimeter. %LAA – Percent Low attenuation area, HU – Hounsfield Units



**Table S2-G. Characteristics of Individuals Included in Category G in Figure 2.** Individuals included in the analysis of FEV<sub>1</sub> decline are listed as those with a Phase 2 visit and FEV<sub>1</sub> measured. Data for missing individuals are shown for those who were alive but did not have a Phase 2 visit with FEV<sub>1</sub> measured and those who died and did not have a Phase 2 visit. Deaths due to respiratory death are also listed. All data are from the baseline visit (i.e., Phase 1).

| <b>Category G</b>                                  |                                |                                   |                              |                           |
|----------------------------------------------------|--------------------------------|-----------------------------------|------------------------------|---------------------------|
| <b>N=1442</b>                                      |                                |                                   |                              |                           |
| <b>CATEGORY</b>                                    | <b>Visit 2 FEV<sub>1</sub></b> | <b>No Visit 2 FEV<sub>1</sub></b> | <b>No Visit 2 &amp; Died</b> | <b>Respiratory Death*</b> |
| N                                                  | 898                            | 403                               | 141                          | 31                        |
| Sex (% Male)                                       | 58.2%                          | 57.6%                             | 58.2%                        | 48.4%                     |
| Race (% NHW)                                       | 78.5%                          | 69.2%                             | 78.0%                        | 71.0%                     |
| Age (yrs)                                          | 63.2 (8.6)                     | 60.8 (9.6)                        | 65.3 (9.1)                   | 69.5 (8.5)                |
| BMI (Kg/m <sup>2</sup> )                           | 27.7 (5.4)                     | 27.9 (5.5)                        | 26.8 (5.7)                   | 24.0 (4.5)                |
| Pack years                                         | 46.2 (23.4)                    | 45.6 (25.2)                       | 50.8 (29.9)                  | 45.7 (21.5)               |
| Current Smoker                                     | 43.4%                          | 57.6%                             | 42.6%                        | 12.9%                     |
| <b>Spirometry</b>                                  |                                |                                   |                              |                           |
| FEV <sub>1</sub> % predicted                       | 71.5 (17.3)                    | 70.3 (15.8)                       | 61.9 (19.8)                  | 45.9 (15.3)               |
| FVCP% predicted                                    | 89.0 (18.2)                    | 85.9 (16.1)                       | 82.6 (17.5)                  | 80.0 (18.5)               |
| FEV <sub>1</sub> /FVC                              | 0.62 (0.11)                    | 0.63 (0.11)                       | 0.57 (0.13)                  | 0.43 (0.11)               |
| <b>CT Metrics</b>                                  |                                |                                   |                              |                           |
| Emphysema (LAA% ≤ -950 HU)                         | 7.75 (8.40)                    | 5.84 (7.27)                       | 10.12 (10.51)                | 17.6 (11.62)              |
| Gas Trapping (LAA% ≤ -856 HU)                      | 28.14 (15.96)                  | 24.25 (15.95)                     | 33.24 (18.61)                | 48.64 (15.36)             |
| Pi10, mm                                           | 2.47 (0.55)                    | 2.65 (0.62)                       | 2.61 (0.58)                  | 2.60 (0.45)               |
| SGRQ Total Score                                   | 14.93 (12.76)                  | 16.90 (13.63)                     | 20.55 (14.75)                | 27.87 (16.48)             |
| <b>Symptoms</b>                                    |                                |                                   |                              |                           |
| Distance walked (feet)                             | 1481 (319)                     | 1403 (356)                        | 1250 (344)                   | 1152 (326)                |
| mMRC ≥2                                            | 0%                             | 0%                                | 0%                           | 0%                        |
| Chronic bronchitis                                 | 0%                             | 0%                                | 0%                           | 0%                        |
| Severe Exacerbation                                | 5.5%                           | 8.4%                              | 12.8%                        | 29.0%                     |
| *Cause of death was adjudicated for 85% of deaths. |                                |                                   |                              |                           |

Results shown are mean (SD) or percent (%) as indicated. NHW – Non-Hispanic White, SGRQ – St. George’s Respiratory Questionnaire, mMRC – modified Medical Research Council Dyspnea Score, Pi10 – Square root of airway wall area for a standardized airway of 10 mm internal perimeter. %LAA – Percent Low attenuation area, HU – Hounsfield Units

**Table S2-H. Characteristics of Individuals Included in Category H in Figure 2.** Individuals included in the analysis of FEV<sub>1</sub> decline are listed as those with a Phase 2 visit and FEV<sub>1</sub> measured. Data for missing individuals are shown for those who were alive but did not have a Phase 2 visit with FEV<sub>1</sub> measured and those who died and did not have a Phase 2 visit. Deaths due to respiratory death are also listed. All data are from the baseline visit (i.e., Phase 1).

| <b>Category H<br/>N=2875</b>                       |                                |                                       |                                  |                               |
|----------------------------------------------------|--------------------------------|---------------------------------------|----------------------------------|-------------------------------|
| <b>Characteristic</b>                              | <b>Visit 2 FEV<sub>1</sub></b> | <b>No Visit 2<br/>FEV<sub>1</sub></b> | <b>No Visit 2 &amp;<br/>Died</b> | <b>Respiratory<br/>Death*</b> |
| N                                                  | 1296                           | 807                                   | 772                              | 326                           |
| Sex (% Male)                                       | 51.6%                          | 52.0%                                 | 59.8%                            | 58.3%                         |
| Race (% NHW)                                       | 73.0%                          | 73.0%                                 | 80.2%                            | 82.2%                         |
| Age (yrs)                                          | 61.5 (8.6)                     | 60.9 (8.9)                            | 65.3 (8.6)                       | 66.2 (8.0)                    |
| BMI (Kg/m <sup>2</sup> )                           | 29.5 (6.9)                     | 29.3 (7.0)                            | 27.0 (6.6)                       | 26.0 (6.5)                    |
| Pack years                                         | 51.9 (27.1)                    | 51.3 (25.8)                           | 59.4 (32.0)                      | 59.6 (32.9)                   |
| Current Smoker                                     | 45.1%                          | 48.0%                                 | 37.3%                            | 27.0%                         |
| <b>Spirometry</b>                                  |                                |                                       |                                  |                               |
| FEV <sub>1</sub> % predicted                       | 55.4 (18.3)                    | 53.6 (19.7)                           | 40.4 (19.8)                      | 31.3 (14.1)                   |
| FVCP % predicted                                   | 78.7 (17.4)                    | 76.3 (18.4)                           | 69.6 (19.9)                      | 64.4 (19.4)                   |
| FEV <sub>1</sub> /FVC                              | 0.54 (0.14)                    | 0.54 (0.15)                           | 0.43 (0.15)                      | 0.37 (0.11)                   |
| <b>CT Metrics</b>                                  |                                |                                       |                                  |                               |
| Emphysema (LAA% ≤ -950 HU)                         | 11.32 (11.53)                  | 11.43 (12.55)                         | 19.24 (15.04)                    | 24.45 (14.71)                 |
| Gas Trapping (LAA% ≤ -856 HU)                      | 34.72 (19.55)                  | 34.69 (21.68)                         | 47.54 (21.42)                    | 55.32 (18.34)                 |
| Pi10, mm                                           | 2.76 (0.60)                    | 2.86 (0.59)                           | 2.87 (0.53)                      | 2.89 (0.49)                   |
| <b>Symptoms</b>                                    |                                |                                       |                                  |                               |
| SGRQ Total Score                                   | 44.66 (18.4)                   | 49.60 (18.97)                         | 52.62 (17.48)                    | 56.45 (15.8)                  |
| Distance walked (feet)                             | 1206 (353)                     | 1120 (365)                            | 942 (390)                        | 848 (361)                     |
| mMRC ≥2                                            | 87.2%                          | 89.4%                                 | 94.8%                            | 97.2%                         |
| Chronic bronchitis                                 | 38.5%                          | 39.4%                                 | 37.6%                            | 35.9%                         |
| Severe Exacerbation                                | 20.9%                          | 26.8%                                 | 32.1%                            | 38.3%                         |
| *Cause of death was adjudicated for 85% of deaths. |                                |                                       |                                  |                               |

Results shown are mean (SD) or percent (%) as indicated. NHW – Non-Hispanic White, SGRQ – St. George’s Respiratory Questionnaire, mMRC – modified Medical Research Council Dyspnea Score, Pi10 – Square root of airway wall area for a standardized airway of 10 mm internal perimeter. %LAA – Percent Low attenuation area, HU – Hounsfield Units
